# Supplementary material for: Driving Factors of Oxalic Acid and Enhanced Role of Gas-Phase Oxidation under Cleaner Conditions: Insights from 2007–2018 Field Observations in the Pearl River Delta
Source: Copernicus journal article supplement (doi:10.5194/egusphere-2025-4624), 2025-10-05
Supplement: Supplementary file [file egusphere-2025-4624-AC2-supplement.pdf]

**Driving Factors of Oxalic Acid and Enhanced Role of Gas-Phase Oxidation under Cleaner Conditions: Insights from 2007–2018 Field Observations in the Pearl River Delta**  
**Response Letter to Reviewer's Comments**

Dear reviewer:

We sincerely appreciate your time and constructive comments. In response, we conducted a more detailed data interpretation and incorporated relevant supporting evidence to strengthen the reliability of our conclusions. We have also carefully revised the manuscript to improve clarity and facilitate better understanding for readers. Our point-by-point responses are marked in blue and the corresponding changes to the original text are shown below each response. We hope that these revisions adequately address the comments and concerns.

**Major comments:**

***Comment 1:** The ALWC and  $O_x$  are identified as the drivers of  $C_2$  variation. The authors also highlight the increased contribution of gas-phase oxidation and decreased contribution of aqueous-phase oxidation to  $C_2$  formation as pollution levels declined. However, high air pollution level is usually accompanied by high humidity and low  $O_x$ .*

Response: Thanks for comment. In Table S6, we provided information under different pollution levels during our study period. Because the sampling was conducted in the same season (mainly from October to December), the inter-annual differences in meteorological condition are small. Relative humidity fluctuated within a narrow range (56% ~ 67%) under different pollution levels. Due to strict emission control measures during the past decades in the Pearl River Delta (PRD) region (Bian et al., 2019), dramatic reductions were identified in sulfate and nitrate, which are the highly hygroscopic compounds in  $PM_{2.5}$ . As a result, aerosol liquid water content (ALWC) decreased significantly from  $20.9 \mu\text{g m}^{-3}$  (high pollution, IT0) to  $7.5 \mu\text{g m}^{-3}$  (low pollution, IT4).

In many urban environments, high pollution levels are often accompanied by suppressed  $O_x$  concentrations. This results from that heavy pollution events are typically characterized by stagnant meteorological conditions, high relative humidity, and elevated NO emissions. Under such conditions, strong NO titration efficiently removes  $O_3$ , leading to lower  $O_3$  and thus lower  $O_x$ . However, previous WRF-Chem simulations have demonstrated that the response of  $O_3$  to anthropogenic emission changes exhibits strong regional heterogeneity in China (Wang et al., 2021). For example, emission reduction due to the COVID-19 lockdown increased  $O_3$  concentrations in the Yangtze River Delta (YRD) and central China, while it led to  $O_3$  decrease in most parts of the PRD. This could be explained by the regional disparities of the  $O_3$ – $NO_x$ –VOC regime. In PRD, most rural areas were  $NO_x$ -limited (our sampling site is located in a rural area), which means that

the reductions in anthropogenic emissions would lead to lower O<sub>3</sub>. This is consistent with our observations showing a decreasing trend in O<sub>x</sub> concentrations from 163.7 µg m<sup>-3</sup> (high pollution, IT0) to 72.7 µg m<sup>-3</sup> (low pollution, IT4).

**Table S6. Meteorological parameters, PM2.5 main components, organic molecular tracers, diacids, pH, and ALWC in the PRD (IT0-IT4).**

|                                                   | IT0          | IT1          | IT2          | IT3          | IT4          |
|---------------------------------------------------|--------------|--------------|--------------|--------------|--------------|
| <b>I. Meteorological parameters</b>               |              |              |              |              |              |
| Temperature (°C)                                  | 20.2 ± 2.9   | 21.5 ± 3.6   | 21.6 ± 3.4   | 22.8 ± 3.1   | 20.8 ± 4.8   |
| Relative humidity (%)                             | 56 ± 12.4    | 56 ± 13      | 62 ± 10      | 67 ± 9       | 66 ± 7       |
| Solar radiation (W m <sup>-2</sup> )              | 148.0 ± 43.9 | 145.6 ± 42.6 | 118.0 ± 46   | 115.5 ± 43.4 | 112.0 ± 50.5 |
| Boundary layer height (m)                         | 578 ± 159    | 578 ± 134    | 613 ± 167    | 583 ± 142    | 626 ± 154    |
| <b>II. Molecular tracers (ng m<sup>-3</sup>)</b>  |              |              |              |              |              |
| Levogluconan                                      | 333 ± 225    | 194 ± 131    | 114 ± 79     | 96 ± 74      | 63 ± 34      |
| Hopanes                                           | 3.4 ± 2.6    | 2.0 ± 1.6    | 1.3 ± 1.9    | 0.88 ± 0.70  | 0.54 ± 0.30  |
| Octadecanoic acid                                 | 37.5 ± 21.0  | 28.4 ± 17.2  | 22.3 ± 14.8  | 17.3 ± 8.7   | 11.3 ± 0.93  |
| Picene                                            | 0.26 ± 0.20  | 0.22 ± 0.15  | 0.18 ± 0.11  | 0.17 ± 0.10  | 0.10 ± 0.04  |
| Terephthalic acid                                 | 50.0 ± 46.8  | 48.9 ± 30.7  | 32.1 ± 31.3  | 27.9 ± 27.1  | 14.5 ± 12.4  |
| Phthalic acid                                     | 40.3 ± 17.8  | 29.2 ± 16.0  | 22.7 ± 10.2  | 19.6 ± 10.1  | 14.1 ± 8.8   |
| DHOPA                                             | 2.52 ± 2.28  | 2.27 ± 2.07  | 1.42 ± 1.06  | 1.05 ± 1.01  | 0.78 ± 0.43  |
| Malic acid                                        | 19.0 ± 19.0  | 16.6 ± 16.4  | 9.6 ± 8.3    | 7.4 ± 6.1    | 3.9 ± 2.3    |
| <b>III. Aliphatic Diacids (ng m<sup>-3</sup>)</b> |              |              |              |              |              |
| Oxalic acid (C <sub>2</sub> )                     | 619 ± 290    | 483 ± 200    | 329 ± 158    | 293 ± 125    | 189 ± 102    |
| Succinic acid (C <sub>4</sub> )                   | 55.0 ± 49.5  | 29.3 ± 28.5  | 18.5 ± 14.2  | 16.7 ± 12.7  | 12.9 ± 12.1  |
| Glutaric acid (C <sub>5</sub> )                   | 12.5 ± 10.5  | 6.4 ± 5.9    | 4.8 ± 2.7    | 4.2 ± 4.2    | 4.5 ± 5.6    |
| Adipic acid (C <sub>6</sub> )                     | 7.1 ± 4.2    | 4.9 ± 3.4    | 4.0 ± 2.7    | 3.4 ± 2.5    | 2.9 ± 2.6    |
| Pimelic acid (C <sub>7</sub> )                    | 1.9 ± 1.3    | 1.4 ± 0.8    | 1.1 ± 0.7    | 1.1 ± 0.9    | 0.7 ± 0.5    |
| Suberic acid (C <sub>8</sub> )                    | 3.0 ± 2.2    | 2.5 ± 1.5    | 2.2 ± 1.3    | 2.0 ± 1.3    | 1.4 ± 1.0    |
| Azelaic acid (C <sub>9</sub> )                    | 13.5 ± 12.3  | 11.9 ± 8.3   | 10.4 ± 7.0   | 9.6 ± 6.1    | 6.7 ± 3.8    |
| Sebacic acid (C <sub>10</sub> )                   | 2.0 ± 1.8    | 1.7 ± 1.2    | 1.6 ± 1.3    | 1.5 ± 1.1    | 1.0 ± 0.9    |
| Subtotal                                          | 734 ± 337    | 540 ± 218    | 358 ± 163    | 325 ± 135    | 208 ± 67     |
| <b>IV. Other species</b>                          |              |              |              |              |              |
| pH                                                | 2.04 ± 0.96  | 2.40 ± 0.61  | 2.48 ± 0.43  | 2.36 ± 0.58  | 2.11 ± 0.71  |
| ALWC (µg m <sup>-3</sup> )                        | 20.9 ± 11.0  | 15.1 ± 9.9   | 13.1 ± 6.9   | 13.1 ± 8.0   | 7.2 ± 3.0    |
| O <sub>x</sub> (µg m <sup>-3</sup> )              | 136.7 ± 31.7 | 134.9 ± 34.4 | 111.9 ± 27.1 | 98.5 ± 25.0  | 72.7 ± 19.1  |

**Comment 2:** How did the authors exclude the impacts of different emission levels when addressing the influence of RH and O<sub>x</sub> on C<sub>2</sub> variation?

Response: Thanks for the comment. Anthropogenic volatile organic compounds (AVOCs) are indeed important precursors of C<sub>2</sub>, and their influences should be carefully examined. In this study, instead of excluding impacts of changes in anthropogenic emission, we demonstrated the impacts were limited from the several complementary perspectives.

First, long-term trends showed that anthropogenic emissions (biomass burning, vehicle emission, and cooking) decreased significantly from 2007 to 2018, whereas  $C_2$  did not experience corresponding decline. This initial finding was further supported by correlation analysis, which revealed the consistently weak correlations between  $C_2$  and primary anthropogenic markers throughout the entire dataset. These findings indicated that changes in anthropogenic emissions were not the dominant driving factors for  $C_2$  variations. In contrast,  $O_x$  and ALWC displayed strong correlations with  $C_2$ , suggesting they are main drivers of  $C_2$  variability.

However, we acknowledge that when investigating the influence of  $O_x$  and ALWC on  $C_2$  variations under different pollution levels (IT0-IT4), the original manuscript did not include the corresponding correlations between  $C_2$  and other factors within each category. The absence of this information indeed weakens the logical completeness of our argument. To address this, we have added the relevant results to the Supplement (Table S7). It shows the correlations between  $C_2$  and primary anthropogenic markers (Levoglucosan, hopanes, octadecanoic acid, picene, and terephthalic acid) remain generally weak across all pollution categories. This indicates that changes in anthropogenic emissions exert only limited influence on  $C_2$  variations. Moreover, fluctuations in anthropogenic markers within each category were not substantial. Thus, it is reasonable that we apply the correlation coefficients between  $C_2$  and  $O_x$ /ALWC to reflect their influences on  $C_2$  formation.

Additionally, instead of simply excluding anthropogenic emissions from consideration, we quantitatively assessed their influence using a machine learning model. The results show that changes in anthropogenic emissions contribute only a small portion (~14%) of the overall variability in  $C_2$ . This quantitative evidence strengthens our conclusion that variations in gas-phase and aqueous-phase oxidation are the dominant drivers of  $C_2$  variations.

**Table S7. Correlations between  $C_2$  and various factors under different pollution levels.**

|                          | IT0                   | IT1                    | IT2                  | IT3                  | IT4                   |
|--------------------------|-----------------------|------------------------|----------------------|----------------------|-----------------------|
| <b>Levoglucosan</b>      | 0.17 (-0.05, 0.37)    | -0.03 (-0.22, 0.16)    | -0.10 (-0.36, 0.16)  | 0.01 (-0.23, 0.26)   | -0.29 (-0.61, 0.11)   |
| <b>Hopanes</b>           | -0.04 (-0.25, 1.08)   | -0.21 (-0.38, -0.01) * | -0.05 (-0.31, 0.22)  | 0.29 (0.05, 0.49) *  | 0.41 (-0.01, 0.70) *  |
| <b>Octadecanoic acid</b> | 0.54 (0.36, 0.68) **  | -0.03 (-0.22, 0.16)    | 0.01 (-0.26, 0.27)   | -0.03 (-0.26, 0.22)  | 0.17 (-0.23, 0.52)    |
| <b>Picene</b>            | 0.06 (-0.17, 0.28)    | -0.28 (-0.46, -0.07) * | -0.18 (-0.45, 0.12)  | 0.08 (-0.25, 0.39)   | 0.02 (-0.62, 0.64)    |
| <b>Terephthalic acid</b> | 0.40 (0.20, 0.57) **  | 0.23 (0.04, 0.40) *    | 0.43 (0.19, 0.62) ** | 0.34 (0.11, 0.54) *  | 0.41 (0.04, 0.69) *   |
| <b>Phthalic acid</b>     | 0.63 (0.47, 0.74) **  | 0.28 (0.01, 0.45) **   | 0.44 (0.20, 0.63) ** | 0.34 (0.11, 0.54) ** | 0.31 (0.01, 0.54) **  |
| <b>DHOPA</b>             | 0.19 (-0.13, 0.30) *  | 0.49 (0.29, 0.60) **   | 0.45 (0.21, 0.64) ** | 0.42 (0.20, 0.61) ** | 0.32 (-0.01, 0.65) ** |
| <b>Malic acid</b>        | 0.33 (0.13, 0.52) *   | 0.53 (0.38, 0.66) **   | 0.66 (0.48, 0.77) ** | 0.69 (0.44, 0.75) ** | 0.72 (0.45, 0.87) **  |
| <b><math>O_x</math></b>  | 0.28 (0.05, 0.48) *   | 0.54 (0.37, 0.68) **   | 0.56 (0.25, 0.70) ** | 0.51 (0.42, 0.75) ** | 0.68 (0.39, 0.84) **  |
| <b>J(O1D)</b>            | 0.366 (0.15, 0.53) ** | 0.17 (-0.03, 0.36)     | 0.33 (0.05, 0.56) *  | 0.13 (-0.12, 0.37)   | -0.09 (-0.49, 0.34)   |
| <b>J(NO2)</b>            | 0.29 (0.08, 0.48) **  | 0.14 (-0.07, 0.33)     | 0.49 (0.24, 0.68) ** | 0.22 (-0.03, 0.45)   | 0.02 (-0.40, 0.44)    |
| <b>Sulfate</b>           | 0.49 (0.28, 0.62) **  | 0.29 (0.12, 0.46) **   | 0.60 (0.43, 0.74) ** | 0.42 (0.21, 0.59) ** | 0.55 (0.24, 0.76) **  |
| <b>ALWC</b>              | 0.48 (0.31, 0.65) **  | 0.36 (0.19, 0.50) **   | 0.32 (0.09, 0.53) ** | 0.30 (0.08, 0.49) ** | 0.15 (-0.01, 0.31)    |

|                    | IT0                 | IT1                  | IT2                     | IT3                  | IT4                  |
|--------------------|---------------------|----------------------|-------------------------|----------------------|----------------------|
| <b>pH</b>          | -0.19 (-0.39, 0.03) | -0.15 (-0.32, 0.03)  | -0.38 (-0.57, -0.16) ** | -0.01 (-0.24, 0.22)  | -0.19 (-0.54, 0.21)  |
| <b>Temperature</b> | 0.24 (0.02, 0.43) * | 0.42 (0.27, 0.56) ** | 0.50 (0.30, 0.67) **    | 0.40 (0.19, 0.58) ** | 0.63 (0.35, 0.81) ** |
| <b>RH</b>          | 0.15 (-0.06, 0.36)  | 0.28 (0.11, 0.44) ** | -0.03 (-0.21, 0.26)     | -0.03 (-0.19, 0.26)  | -0.03 (-0.39, 0.33)  |
| <b>SR</b>          | -0.01 (-0.23, 0.21) | 0.13 (-0.06, 0.30)   | 0.43 (0.21, 0.61) **    | 0.42 (0.21, 0.59) ** | 0.53 (0.22, 0.75) ** |

The values in brackets indicate the 95% confidence intervals (CIs) of the correlation coefficients. One, two asterisks denote p values less than 0.05, 0.01, respectively. No asterisk denotes the correlations are not statistically significant.

The results of correlation analysis are presented in Fig. 3. The correlation coefficients between  $C_2$  and SOA tracers (phthalic acid, DHOPA, and malic acid) were relatively higher ( $r = 0.58, 0.41$ , and  $0.51$ , respectively;  $p < 0.01$ ), further supporting that  $C_2$  was primarily formed via secondary oxidation processes. Meng et al. (2023) reported an unexpected enhancement of  $C_2$  during the COVID-19 pandemic, when anthropogenic emissions were substantially reduced. This reflected limited influence of reductions in anthropogenic organic precursors on formation of  $C_2$ . Similarly, we found that anthropogenic emissions experienced substantial reductions during our campaign period (discussed in Section 3.1), while  $C_2$  did not show a corresponding significant decreasing trend. Although strong correlations between  $C_2$  and primary anthropogenic source markers were observed in certain individual years, the correlations remained weak across the entire dataset. These findings implied that the changes in anthropogenic emissions were not the driving factor for  $C_2$  formation in this study. Because our field measurements were conducted in the same season each year (from October to December), the inter-annual differences in meteorological conditions were small. This resulted in consistently weak correlations observed between  $C_2$  and meteorological parameters such as temperature, SR, and RH. Therefore, we concluded that the changes in meteorology were too small to be the driving factor for  $C_2$  formation.

As presented in Fig. 3, the correlations between  $C_2$  and ALWC weakened, whereas that between  $C_2$  and  $O_x$  strengthened from 2007 to 2018. It is noteworthy that no significant correlations were observed between  $C_2$  and  $O_x$  in 2007 and 2010, when ALWC concentrations were high. In contrast, a strong correlation ( $r = 0.62$ ,  $p < 0.01$ ) emerged in 2008, coinciding with a sharp decrease in ALWC (Fig. S5). This suggested that the gas-phase formation pathway of  $C_2$  might be enhanced when ALWC was low. The pattern became more pronounced with decreasing pollution levels (Fig. 4). From IT0 to IT4, ALWC decreased from  $20.9 \pm 11.0 \mu\text{g m}^{-3}$  to  $7.2 \pm 3.0 \mu\text{g m}^{-3}$  (Table S6). The Pearson's  $r$  values between  $C_2$  and ALWC dropped from 0.43 to 0.15, whereas that between  $C_2$  and  $O_x$  increased from 0.28 to 0.68. The opposite trends implied the roles of gas-phase and aqueous-phase oxidation in  $C_2$  formation might change. However, the precision and stability of Pearson's  $r$  values are strongly influenced by sample size when the variations appear small or when sample sizes differ among groups. Therefore, the differences in Pearson's  $r$  values do not necessarily imply statistically significant changes, especially when they are very close (IT1–IT4). To assess the

statistical significance of these differences, we compared correlation coefficients between groups using the method described in Text S1. As shown in Table S8–S9, significant differences in the C<sub>2</sub>-O<sub>x</sub> correlation were observed only between IT0 and the other pollution levels. For the C<sub>2</sub>-ALWC correlation, a significant difference was found only between IT0 and IT4. Given that IT1–IT4 represents a continuous evolution of atmospheric conditions, rather than discrete and independent regimes, large differences in correlation coefficients among these categories are not expected. Although the correlation between C<sub>2</sub> and sulfate was strong, it did not show the similar trends as that between C<sub>2</sub> and ALWC. In contrast, the correlations between C<sub>2</sub> and primary anthropogenic markers remained generally weak across all pollution categories (Table S7), indicating that changes in anthropogenic emissions exert only limited influence on C<sub>2</sub> variations. Therefore, the significant and opposite changes in correlations of C<sub>2</sub> with O<sub>x</sub> and ALWC between high pollution level (IT0) and low pollution level (IT4) suggested a shift in the dominant C<sub>2</sub> formation pathway from aqueous-phase oxidation to gas-phase photochemical oxidation under lower pollution conditions.

**Comment 3:** *In Fig. 5, the correlation between C<sub>2</sub> and O<sub>x</sub> is always higher than that between C<sub>2</sub> and ALWC under IT1, 2, 3, and 4. The correlation between C<sub>2</sub> and ALWC is weak under any IT condition.*

Response: Thanks for the comment. In this study, both O<sub>x</sub> and ALWC display significant positive correlations with C<sub>2</sub> under most pollution levels. Our results show that the correlation coefficients between C<sub>2</sub> and O<sub>x</sub> are consistently higher than that between C<sub>2</sub> and ALWC under IT1–IT4, whereas the C<sub>2</sub>-ALWC correlations is higher than that of C<sub>2</sub>-O<sub>x</sub> under IT0 (Figure 4, see below). This pattern likely results from the reduction in pollution levels (accompanied by decreases in ALWC), which weakens the role of aqueous-phase oxidation in C<sub>2</sub> formation, while the contribution from gas-phase oxidation becomes relatively more important.

We note that the Pearson correlation coefficients reflect the strength of linear associations but do not directly represent the quantitative contribution of each factor. Thus, the lower Pearson's *r* values between C<sub>2</sub> and ALWC than those between C<sub>2</sub> and O<sub>x</sub> under IT1-IT4 do not necessarily imply a smaller contribution of aqueous-phase pathways compared with gas-phase pathways. Here, correlation analysis is used primarily to identify potential drivers and their changing patterns, while a machine learning model is further applied to quantify their contributions to C<sub>2</sub> variations.

Although the correlations between C<sub>2</sub> and ALWC is relatively weak under IT1-IT4, they are still stronger than those for other factors (Table S7, see above). This weak correlation may arise from several reasons: (1) reductions in pollution levels (and ALWC) weaken the influence of aqueous-phase oxidation; (2) the effect of ALWC on C<sub>2</sub> may be non-linear and not fully captured by linear correlation; (3) ALWC serves as an indicator of aqueous-phase processes in this study, but aqueous production also depends on other factors such as transition metals and oxidant availability.

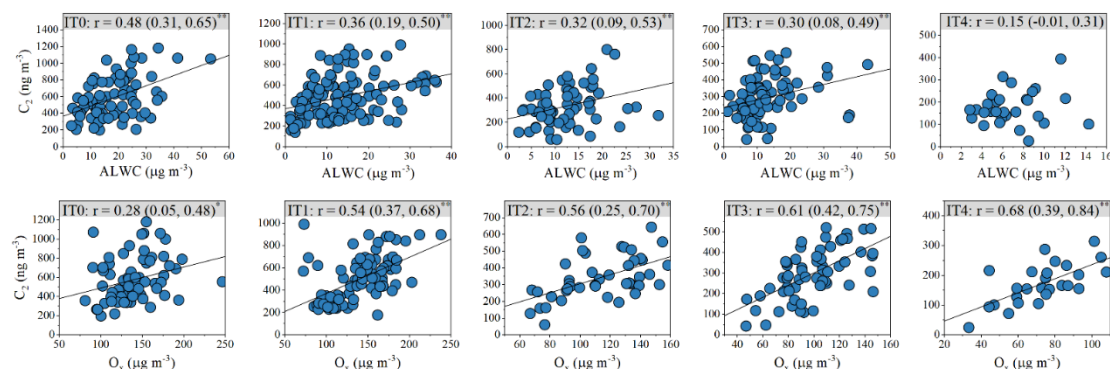

**Figure 4.** The correlation between C<sub>2</sub> and ALWC, as well as O<sub>x</sub>. The values in brackets indicate the 95% confidence intervals (CIs) of the correlation coefficients. One, two asterisks denote p values less than 0.05, 0.01, respectively. With decreasing pollution levels, the correlation between C<sub>2</sub> and ALWC weakens, whereas that between C<sub>2</sub> and O<sub>x</sub> strengthens.

The Pearson correlation coefficients reflect the strength of linear associations but do not directly represent the quantitative contribution of each factor. Thus, the lower Pearson's r values between C<sub>2</sub> and ALWC than those between C<sub>2</sub> and O<sub>x</sub> under IT1-IT4 do not necessarily imply a smaller contribution of aqueous-phase pathways compared with gas-phase pathways. Here, correlation analysis is used primarily to identify potential drivers and their changing patterns, while a machine learning model is further applied to quantify their contributions to C<sub>2</sub> variations.

**Comment 4:** Section 3.4: For the machine learning analysis, the authors quantify the contributions of different sources using some input parameters. The rationality of this approach needs to be elaborated. For example, air temperature, solar radiation, and relative humidity are used to represent the emission of biogenic precursors (lines 318-319). Do all these meteorological factors promote the emission of biogenic precursors? For biogenic emissions, is there a synergistic or antagonistic mechanism between these factors? Please explain in detail. The reasonability of using the input parameters to represent other sources also needs to be elaborated.

Response: Thanks for this valuable comment. We apologize for the missing explanation regarding the selection of input parameters in the original manuscript. Each variable used in the machine learning model should be chosen rationally to ensure the reliability of the results. We have now added a detailed discussion on the selection of input parameters in Section 3.4.

The rationality for selecting the variables used to train the model need to be clarified to ensure the reliability of the results. Levoglucosan, hopanes, octadecanoic acid, picene, and tPh serve as source-specific molecular markers for biomass burning, vehicle emission, cooking, coal combustion, and waste incineration, respectively. These species are used to represent changes in AVOC. As two of the most important BVOCs globally, isoprene emission is highly dependent on temperature and solar radiation, while monoterpenes emission is sensitive to temperature (Guenther et al., 1993).

Their emissions rate can be estimated using equation 3-5 and equation 6, respectively:

$$E_i = I_s \cdot C_L \cdot C_T \quad (3)$$

$$C_L = \frac{\alpha c_{L1} L}{\sqrt{1 + \alpha^2 L^2}} \quad (4)$$

$$C_T = \frac{\exp \frac{c_{T1}(T - T_s)}{RT_s T}}{1 + \exp \frac{c_{T2}(T - T_M)}{RT_s T}} \quad (5)$$

where  $E_i$  is isoprene emission rate at a temperature  $T(K)$  and photosynthetically active radiation (PAR) flux  $L$  ( $\mu\text{mol m}^{-2} \text{s}^{-1}$ ),  $I_s$  is isoprene emission rate at a standard temperature  $T_s$  and a standard PAR flux ( $1000 \mu\text{mol m}^{-2} \text{s}^{-1}$ ).  $\alpha = 0.0027$  and  $c_{L1} = 1.066$  are empirical coefficients determined by measurements.  $L$  can be calculated as multiplying solar radiation ( $\text{W m}^{-2}$ ) by photon flux efficacy ( $1.86 \mu\text{mol J}^{-1}$ ).  $R$  is a constant  $-8.314 \text{ J K}^{-1} \text{ mol}^{-1}$ , and  $c_{T1} = 95000 \text{ J mol}^{-1}$ ,  $c_{T2} = 230000 \text{ J mol}^{-1}$ , and  $T_M = 314 \text{ K}$  are empirical coefficients estimated by measurements.

$$E_m = M_s \cdot \exp(\beta(T - T_s)) \quad (6)$$

where  $E_m$  is monoterpenes emission rate at temperature  $T(K)$ ,  $M_s$  is monoterpenes emission rate at a standard temperature  $T_s$ ,  $\beta$  ( $\text{K}^{-1}$ ) is an empirical coefficient ranging from 0.057 to 0.144  $\text{K}^{-1}$ . In addition, inadequate moisture can have significantly decreased stomatal conductance and photosynthesis (Guenther et al., 2006). Therefore, temperature, solar radiation, and RH are important factors determining BVOC emissions. As discussed previously,  $\text{O}_x$ ,  $\text{J}(\text{O}^1\text{D})$ , and  $\text{J}(\text{NO}_2)$  can be employed as indicators of gas-phase oxidation, while ALWC, pH, and sulfate are used as indicators of aqueous-phase processes. To avoid redundant and confounding explanations, the secondary organic molecular markers, such as DHOPA, Ph, and malic acid, were excluded from the model training. These species are influenced by both VOC emissions and secondary oxidation processes, which are already represented by the factors mentioned above.

**Comment 5:** For the contribution of gas-phase oxidation versus aqueous-phase oxidation, is the result here obtained based on machine learning comparable to those reported in published literature?

Response: A previous stable carbon isotopic study conducted in North China (urban site) reported that the contributions of gas-phase and aqueous-phase pathways to  $\text{C}_2$  formation accounted for 12.3% and 47.2% during average days, but shifted to 50.5% and 16.1% during the COVID-19 lockdown.

However, in this study, we investigate the “impacts of **changes** in gas-phase oxidation and aqueous-phase oxidation” by machine learning model, rather than the “**absolute** contributions of gas-phase oxidation and aqueous-phase oxidation”. The former is independent of VOCs precursors because SHAP values reflect the marginal impact of a unit change in each variable on the predicted  $\text{C}_2$  concentration while keeping other variables constant (discussed in Section 2.4). In contrast, the latter is dependent on VOCs precursors. Therefore, our machine learning approach provides a more appropriate and meaningful assessment of process-driven changes in  $\text{C}_2$  formation. Our updated results show that gas-phase and aqueous-phase pathways account for 45% and 34% (after including

additional factors following Reviewer #1's suggestion) for  $C_2$  variations generally. In addition, after inclusion of new factors, the results and general conclusions are similar to our previous version. This further enhances the reliability of our method. The comparison between results of new and old versions is presented below. We apology for some unclear statements in original text, which lead to misunderstanding. We have revised them now.

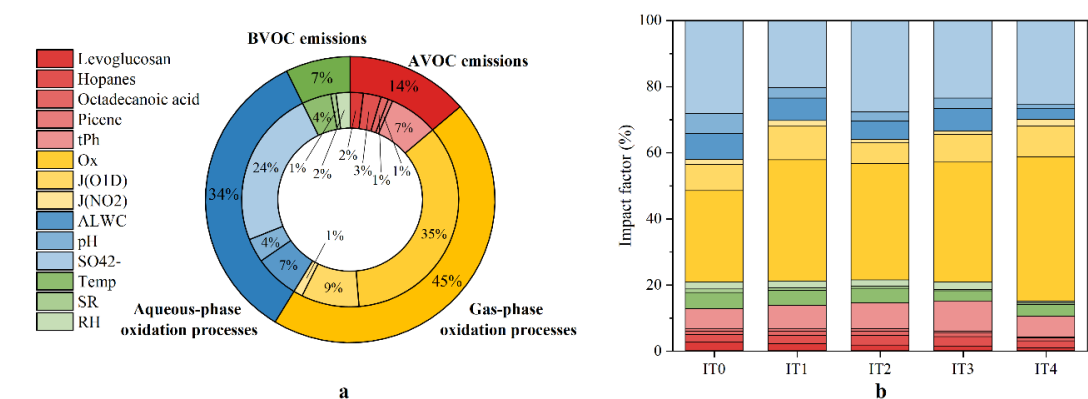

**Figure 6 (new).** (a) Impact of changes of each variable on  $C_2$  variation during the whole study period. (b) Impact factor of individual variable under different pollution conditions.

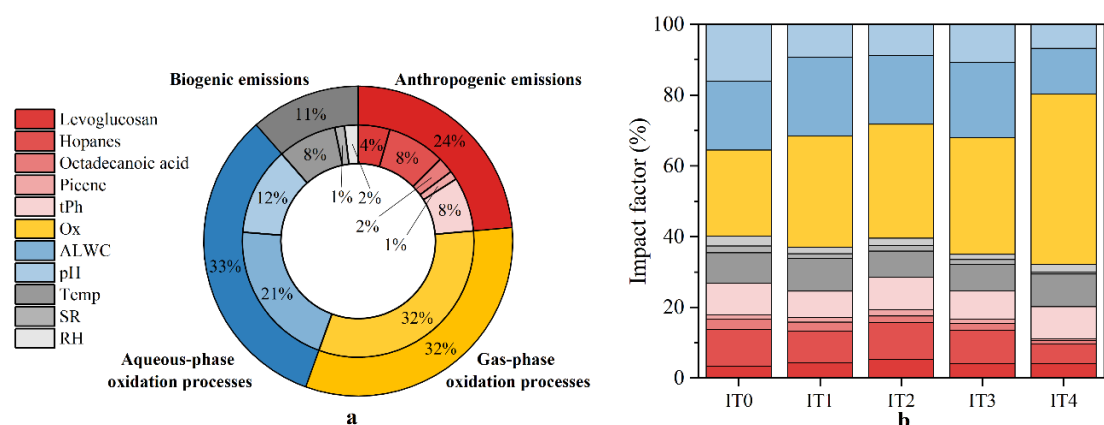

**Figure 6 (old).**

Secondary organic aerosol (SOA) is a dominant constituent of fine particulate matter, exerting significant impacts on both climate and human health. Oxalic acid ( $C_2$ ), a key end-product formed from the oxidation of volatile organic compounds, can provide insights into the formation mechanism of SOA. Thus, long-term measurements of  $C_2$  and related compounds help understand the changes in SOA formation with decreasing pollutant levels. In this study,  $C_2$  and its homologs, along with five primary anthropogenic source markers and three SOA markers, were measured in the Pearl River Delta (PRD) during 2007–2018. The concentrations of  $C_2$  did not exhibit significant downward trends, despite substantial reductions in anthropogenic emissions, such as biomass burning ( $-11\% \text{ yr}^{-1}$ ), vehicle emissions ( $-17\% \text{ yr}^{-1}$ ), and cooking emissions ( $-7\% \text{ yr}^{-1}$ ). Correlation analysis revealed that aerosol liquid water content (ALWC) and  $O_x$  ( $O_3 + NO_2$ ) were the main drivers



of C<sub>2</sub> variations. Moreover, the relative contribution of biogenic SOA increased under cleaner conditions. A machine learning model was applied to quantify the impacts of changes in anthropogenic precursor emissions, biogenic precursor emissions, aqueous-phase oxidation processes, and gas-phase oxidation processes on C<sub>2</sub> variability. As pollution levels declined, the impacts of gas-phase oxidation increased from 37% to 55%, whereas that of aqueous-phase oxidation declined from 42% to 30%. This shift indicated a transition from aqueous-phase to gas-phase pathways in C<sub>2</sub> and SOA formation. Our findings highlight the increasing importance of gas-phase oxidation under low-pollution conditions and underscore the need for effective ozone control strategies to further reduce SOA in the future.

To further quantify the impacts of changes in all factors on C<sub>2</sub>, IF (discussed in Section 2.4) was calculated and presented in Fig. 6. O<sub>x</sub> accounted for the highest contribution (35%), followed by sulfate (24%) and J(O<sup>1</sup>D) (9%). All factors were classified into four groups according to their representativeness mentioned before: (1) AVOC emissions (levoglucosan, hopanes, octadecanoic acid, picene, and tPh); (2) BVOC emissions (Temp, SR, and RH); (3) gas-phase oxidation pathways (O<sub>x</sub>, J(O<sup>1</sup>D), and J(NO<sub>2</sub>)); (4) aqueous-phase oxidation pathways (ALWC, pH, and sulfate). Due to the minor fluctuations of meteorological conditions in each year, the impacts of changes in BVOC emissions on C<sub>2</sub> were small (7%). Although AVOC emissions showed an obvious decreasing trend over the study period, the impacts of these changes (14%) were significantly lower than that of gas-phase oxidation processes (45%) and aqueous-phase oxidation processes (34%). The results were consistent with correlation analysis, underscoring the dominant role of secondary oxidation processes in C<sub>2</sub> formation.

**Comment 6:** Figures 2 and 3: I am curious about the high levels since 2013. Please explain the reasons.

Response: Thanks for the comment. In our previous study, we observed that there was also a rebound in PM<sub>2.5</sub> and its main components since 2013 (Figure 7, see below) (He et al., 2025). Importantly, that analysis employed a measurement technique distinct from the analytical procedures used for organic molecular markers in this study, suggesting that the observed rebound is unlikely to arise from methodological artifacts. We recognize that examining long-term trends of molecular markers is inherently challenging, as even minor changes in sampling or analytical protocols may introduce discontinuities. Consequently, it was necessary to assess the stability of both the sampling procedures and the analytical system over the entire study period.

Because background concentrations of many organic molecular markers were below detection limits, we examined the long-term patterns of PM<sub>2.5</sub> main components in blank filter samples to evaluate whether sampling or environment biases were related to this phenomenon. As shown in Figure 8

(see below), these species exhibited minimal variability in the blank filter samples and no obvious increase was observed since 2013, indicating that the potential sampling bias was negligible.

To further assess analytical stability, we examined the response factors (RFs) derived from annual calibration curves for all quantified compounds (Table S4, see below). The RF values remained highly consistent across years, indicating that neither instrument sensitivity nor analytical performance experienced significant drift during the measurement period.

Meteorological variability was also considered as a potential driver. However, interannual differences in temperature, relative humidity, solar radiation, and boundary layer height were small (Table S5), suggesting that meteorology alone cannot explain the observed rebound.

In addition, another study covering multiple stations in the PRD region also reported a similar increase in PM<sub>2.5</sub> and its main components since 2013 (Figure 9) (Yan et al., 2020), supporting that the rebound was not due to newly emerging pollution sources near our sampling location. However, the underlying cause of this rebound was not elaborated in that study.

Unfortunately, until now, we can not fully explain the rebound since 2013. We have incorporated the relevant information and clarifications in Materials and Method section, which confirms the stability and reliability of our long-term measurements and demonstrate that the observed trends in molecular markers were not driven by methodology.

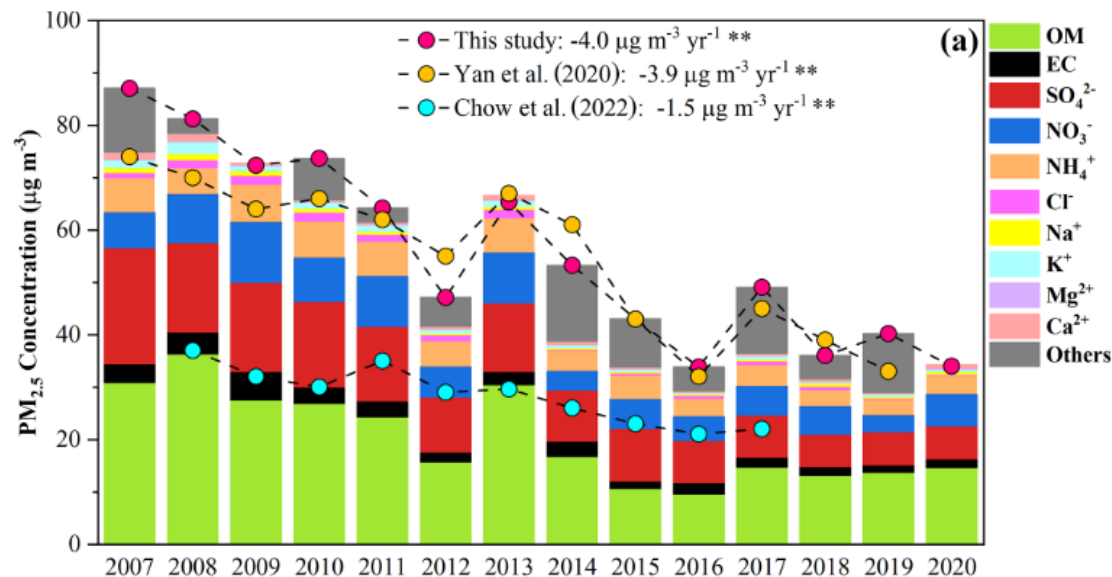

Figure 7. Trend of PM<sub>2.5</sub> and its major components (He et al., 2025).

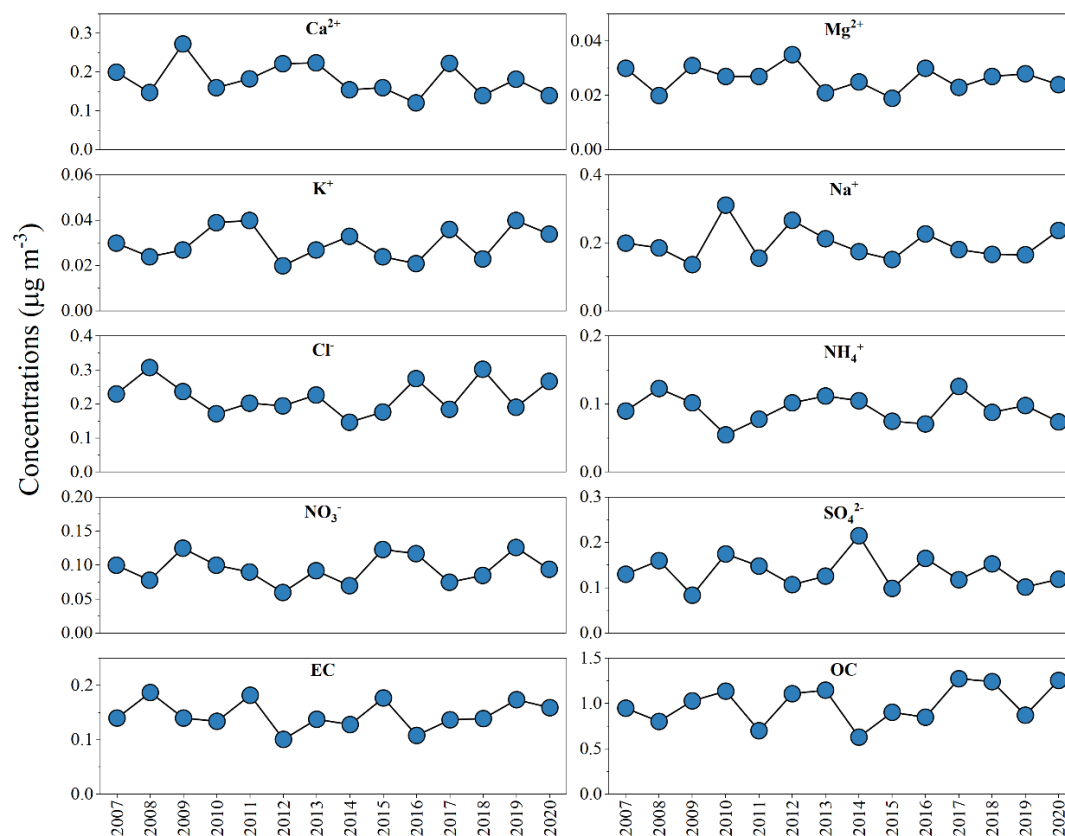

Figure 8. Annual variations in measured compounds of blank filter samples (He et al., 2025).

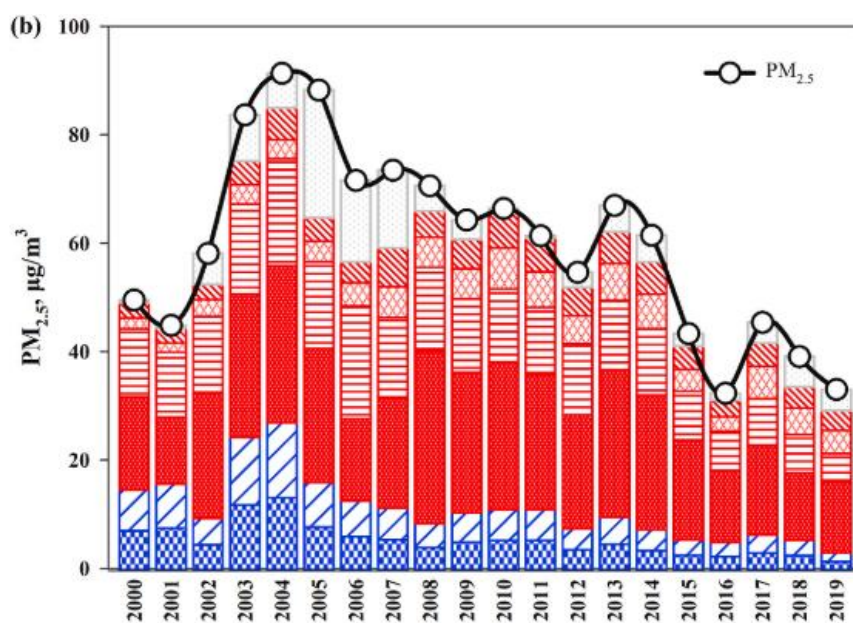

Figure 9. The concentration of  $\text{PM}_{2.5}$  and its chemical compositions from 2000 to 2019 in PRD (Yan et al., 2020).

**Table S4. Response factors (RFs) derived from the annual calibration curves.**

|                                               | 2007 | 2008 | 2009 | 2010 | 2011 | 2012 | 2013 | 2014 | 2015 | 2016 | 2017 | 2018 |
|-----------------------------------------------|------|------|------|------|------|------|------|------|------|------|------|------|
| Succinic acid                                 | 1.79 | 3.66 | 0.90 | 0.93 | 0.93 | 1.47 | 2.11 | 1.47 | 1.47 | 1.65 | 2.41 | 1.52 |
| Glutaric acid                                 | 2.88 | 4.07 | 3.31 | 2.30 | 2.30 | 2.93 | 2.70 | 2.93 | 0.81 | 3.95 | 5.53 | 2.38 |
| Adipic acid                                   | 2.64 | 3.87 | 2.82 | 2.81 | 2.81 | 3.70 | 3.66 | 3.76 | 1.54 | 5.86 | 3.76 | 3.24 |
| Pimelic acid                                  | 2.16 | 2.53 | 2.30 | 2.19 | 2.19 | 3.97 | 3.90 | 3.97 | 3.96 | 5.78 | 3.76 | 4.54 |
| Suberic acid                                  | 2.23 | 2.47 | 2.70 | 2.68 | 2.68 | 4.6  | 3.06 | 4.60 | 5.41 | 7.36 | 4.39 | 6.45 |
| Azelaic acid                                  | 2.03 | 2.03 | 2.42 | 2.41 | 2.41 | 3.99 | 3.12 | 3.98 | 5.07 | 6.37 | 3.44 | 6.87 |
| Sebacic acid                                  | 3.13 | 3.27 | 4.31 | 4.29 | 4.29 | 5.79 | 5.54 | 5.79 | 5.79 | 4.83 | 4.93 | 4.45 |
| Phthalic acid                                 | 1.01 | 1.07 | 0.86 | 0.66 | 0.98 | 1.92 | 1.86 | 1.93 | 1.88 | 1.88 | 1.98 | 1.91 |
| Terephthalic acid                             | 1.01 | 1.07 | 0.86 | 0.66 | 0.98 | 1.92 | 1.86 | 1.93 | 1.88 | 1.88 | 1.98 | 1.91 |
| 17 $\alpha$ (H)-22,29,30-trisnorhopane        | 0.79 | 0.79 | 0.70 | 0.79 | 0.55 | 0.83 | 0.99 | 0.82 | 0.91 | 0.53 | 0.67 | 0.76 |
| 17 $\alpha$ (H),21 $\beta$ (H)-30-norhopane   | 0.73 | 0.73 | 0.63 | 0.73 | 0.53 | 0.74 | 0.87 | 0.75 | 0.78 | 0.46 | 0.62 | 0.78 |
| 17 $\alpha$ (H),21 $\beta$ (H)-30-hopane      | 0.78 | 0.78 | 0.74 | 0.78 | 0.52 | 0.78 | 0.88 | 0.76 | 0.42 | 0.70 | 0.59 | 0.97 |
| 17 $\alpha$ (H),21 $\beta$ (H)-22R-homohopane | 1.26 | 1.26 | 0.72 | 1.26 | 0.45 | 1.11 | 1.50 | 1.12 | 0.42 | 0.73 | 0.91 | 1.75 |
| 17 $\alpha$ (H),21 $\beta$ (H)-22S-homohopane | 1.55 | 1.55 | 0.72 | 1.55 | 1.33 | 1.25 | 1.90 | 1.19 | 0.42 | 1.83 | 1.01 | 1.79 |
| Levogluconan                                  | 1.35 | 1.30 | 1.22 | 0.92 | 1.04 | 0.93 | 0.97 | 0.93 | 0.97 | 0.96 | 0.95 | 0.96 |
| Octadecanoic acid                             | 0.50 | 0.56 | 0.66 | 0.68 | 0.96 | 0.89 | 1.29 | 0.89 | 1.22 | 0.71 | 0.89 | 1.09 |
| Picene                                        | 0.84 | 0.80 | 0.84 | 0.77 | 0.78 | 0.66 | 0.80 | 0.66 | 0.79 | 1.11 | 0.81 | 1.06 |
| Citramalic acid                               | 1.35 | 1.95 | 1.30 | 3.70 | 3.56 | 2.60 | 2.10 | 2.59 | 2.63 | 2.07 | 2.04 | 2.09 |
| Malic acid                                    | 1.46 | 1.46 | 1.16 | 0.95 | 0.91 | 0.87 | 0.86 | 1.02 | 1.15 | 0.85 | 0.76 | 1.05 |

Examining long-term trends of molecular markers is inherently challenging, as even minor changes in sampling or analytical protocols may introduce discontinuities. Consequently, it was necessary to assess the stability of both the sampling procedures and the analytical system over the entire study period. Table S4 presents the response factors (RFs) of all measured species derived from the annual calibration curves. The RF values remained highly consistent across years, indicating that neither instrument sensitivity nor analytical performance experienced significant drift during the measurement period.

Aliphatic DCA, a group of typical SOA molecular markers (Kawamura and Bikkina, 2016), were analyzed to investigate further the changes in SOA formation under decreasing pollutant levels. Although their concentrations in 2007 ( $864 \pm 283 \text{ ng m}^{-3}$ ) were much higher than those in 2018 ( $307 \pm 122 \text{ ng m}^{-3}$ ) (Fig. 3), this downward trend was not statistically significant ( $p > 0.05$ ), which was similar to the trends of other SOA markers. Unexpectedly, a rebound in the concentrations of molecular markers and aliphatic DCA was observed in 2013, which was also observed in  $\text{PM}_{2.5}$  and its major component (He et al., 2025). This rebound was unlikely driven by meteorological variability, as inter-annual differences in key meteorological parameters were relatively small (Table S5). Similarly, another study covering multiple stations across the PRD also report a post-2013 increase in  $\text{PM}_{2.5}$ , supporting that the rebound was not attributable to newly emerging pollution sources near our sampling site (Yan et al., 2020). Unfortunately, until now, the underlying cause of this rebound remained unclear.

**Comment 7:** Lines 250-252: “Meanwhile, the correlations between  $\text{C}_2$  and ASOA markers became weaker. These results suggested ....” Please explain this statement. In Table 1, I did not find an obvious decreasing trend for the correlation coefficients between  $\text{C}_2$  and Phthalic acid (changing from 0.28 under IT1 to 0.31 under IT4) or DHOPA (changing from 0.49 under IT1 to 0.32 under IT4) from IT1 to IT4.

Response: Thanks for the comment. We apologize for this imprecise statement. Indeed, the decreases in correlations between  $\text{C}_2$  and Phthalic acid, as well as DHOPA relatively small. But the correlations between  $\text{C}_2$  and malic acid displayed an obvious increase, suggesting that the relative contribution of BVOCs becomes more important under cleaner environment. We have moved Table 1 to Supplement (Table S7), and removed “Meanwhile, the correlations between  $\text{C}_2$  and ASOA markers became weaker” in the manuscript.

**Table S7. Correlations between  $\text{C}_2$  and various factors under different pollution levels.**

|              | IT0                 | IT1                    | IT2                 | IT3                 | IT4                  |
|--------------|---------------------|------------------------|---------------------|---------------------|----------------------|
| Levogluconan | 0.17 (-0.05, 0.37)  | -0.03 (-0.22, 0.16)    | -0.10 (-0.36, 0.16) | 0.01 (-0.23, 0.26)  | -0.29 (-0.61, 0.11)  |
| Hopananes    | -0.04 (-0.25, 1.08) | -0.21 (-0.38, -0.01) * | -0.05 (-0.31, 0.22) | 0.29 (0.05, 0.49) * | 0.41 (-0.01, 0.70) * |

|                          | IT0                   | IT1                    | IT2                     | IT3                  | IT4                   |
|--------------------------|-----------------------|------------------------|-------------------------|----------------------|-----------------------|
| <b>Octadecanoic acid</b> | 0.54 (0.36, 0.68) **  | -0.03 (-0.22, 0.16)    | 0.01 (-0.26, 0.27)      | -0.03 (-0.26, 0.22)  | 0.17 (-0.23, 0.52)    |
| <b>Picene</b>            | 0.06 (-0.17, 0.28)    | -0.28 (-0.46, -0.07) * | -0.18 (-0.45, 0.12)     | 0.08 (-0.25, 0.39)   | 0.02 (-0.62, 0.64)    |
| <b>Terephthalic acid</b> | 0.40 (0.20, 0.57) **  | 0.23 (0.04, 0.40) *    | 0.43 (0.19, 0.62) **    | 0.34 (0.11, 0.54) *  | 0.41 (0.04, 0.69) *   |
| <b>Phthalic acid</b>     | 0.63 (0.47, 0.74) **  | 0.28 (0.01, 0.45) **   | 0.44 (0.20, 0.63) **    | 0.34 (0.11, 0.54) ** | 0.31 (0.01, 0.54) **  |
| <b>DHOPA</b>             | 0.19 (-0.13, 0.30) *  | 0.49 (0.29, 0.60) **   | 0.45 (0.21, 0.64) **    | 0.42 (0.20, 0.61) ** | 0.32 (-0.01, 0.65) ** |
| <b>Malic acid</b>        | 0.33 (0.13, 0.52) *   | 0.53 (0.38, 0.66) **   | 0.66 (0.48, 0.77) **    | 0.69 (0.44, 0.75) ** | 0.72 (0.45, 0.87) **  |
| <b>O<sub>x</sub></b>     | 0.28 (0.05, 0.48) *   | 0.54 (0.37, 0.68) **   | 0.56 (0.25, 0.70) **    | 0.51 (0.42, 0.75) ** | 0.68 (0.39, 0.84) **  |
| <b>J(O1D)</b>            | 0.366 (0.15, 0.53) ** | 0.17 (-0.03, 0.36)     | 0.33 (0.05, 0.56) *     | 0.13 (-0.12, 0.37)   | -0.09 (-0.49, 0.34)   |
| <b>J(NO2)</b>            | 0.29 (0.08, 0.48) **  | 0.14 (-0.07, 0.33)     | 0.49 (0.24, 0.68) **    | 0.22 (-0.03, 0.45)   | 0.02 (-0.40, 0.44)    |
| <b>Sulfate</b>           | 0.49 (0.28, 0.62) **  | 0.29 (0.12, 0.46) **   | 0.60 (0.43, 0.74) **    | 0.42 (0.21, 0.59) ** | 0.55 (0.24, 0.76) **  |
| <b>ALWC</b>              | 0.48 (0.31, 0.65) **  | 0.36 (0.19, 0.50) **   | 0.32 (0.09, 0.53) **    | 0.30 (0.08, 0.49) ** | 0.15 (-0.01, 0.31)    |
| <b>pH</b>                | -0.19 (-0.39, 0.03)   | -0.15 (-0.32, 0.03)    | -0.38 (-0.57, -0.16) ** | -0.01 (-0.24, 0.22)  | -0.19 (-0.54, 0.21)   |
| <b>Temperature</b>       | 0.24 (0.02, 0.43) *   | 0.42 (0.27, 0.56) **   | 0.50 (0.30, 0.67) **    | 0.40 (0.19, 0.58) ** | 0.63 (0.35, 0.81) **  |
| <b>RH</b>                | 0.15 (-0.06, 0.36)    | 0.28 (0.11, 0.44) **   | -0.03 (-0.21, 0.26)     | -0.03 (-0.19, 0.26)  | -0.03 (-0.39, 0.33)   |
| <b>SR</b>                | -0.01 (-0.23, 0.21)   | 0.13 (-0.06, 0.30)     | 0.43 (0.21, 0.61) **    | 0.42 (0.21, 0.59) ** | 0.53 (0.22, 0.75) **  |

Notably, the correlations between C<sub>2</sub> and malic acid strengthened progressively with the reductions in anthropogenic emissions (from 2007 to 2018). This trend became more apparent when the data were categorized by pollution levels, with the correlation coefficients increased from 0.33 (IT0) to 0.72 (IT4) (Table S7). As discussed previously, malic acid can be produced by photooxidation of both anthropogenic and biogenic precursors. However, no corresponding increasing trends were observed in the correlations between C<sub>2</sub> and ASOA tracers (Ph and DHOPA), supporting that anthropogenic precursors were not the dominant source of malic acid in this study. Thus, these results indicated that the relative contributions of biogenic sources to SOA become more important under cleaner conditions.

**Comment 8:** Lines 287-290: I did not see an obvious difference in the correlation efficiency between C<sub>2</sub> and O<sub>x</sub> or between C<sub>2</sub> and ALWC from IT1 to IT4. The change of Pearson r values seems small.

Response: Thanks for your comment. Although Pearson correlation coefficients provide a measure of association strength, the differences in Pearson r values do not necessarily imply statistically significant changes, especially when the variations appear small or when sample sizes differ among groups. We agree that the significance of the differences in correlation coefficients between different categories need to be further verified, because they are very close from IT1 to IT4.

To further evaluate whether the observed differences in correlation coefficients across the different groups are statistically meaningful, we applied the Fisher *r*-to-*z* transformation test. This method converts Pearson r values into approximately normally distributed z-scores, enabling a rigorous statistical comparison between two independent correlations. Thus, it allows us to determine whether the correlation strength between C<sub>2</sub> and ALWC or between C<sub>2</sub> and O<sub>x</sub> differs significantly

under different pollution levels, thereby providing a more robust basis for our interpretation. We have added the methodological description and the corresponding results in the Supplement (Text S1, Table S8-S9; see below). In addition, we calculated the 95% confidence intervals (95% CIs) of Pearson  $r$  values for each group and included them in Figure 4.

The results show that, for the correlation between  $C_2$  and  $O_x$ , significant differences in Pearson  $r$  values are only observed between IT0 and other pollution levels. For the correlation between  $C_2$  and ALWC, significant difference in Pearson  $r$  values is only observed between IT0 and IT4. Although  $r$  value itself is not a function of sample size, its precision and stability are strongly influenced by sample size. Smaller sample size leads to wider confidence intervals and greater variability in Pearson  $r$ , which may mask the differences between groups. In addition, IT-IT4 represents a continuous evolution of atmospheric conditions, rather than discrete and independent regimes. Consequently, the differences in correlation coefficients among IT1-IT4 are not expected to be very large. We acknowledge that the differences in correlation coefficients from IT1 to IT4 are not statistically significant due to the limit of our relatively small sample size in each group, and it is imprecise to claim an increase/decrease trend in correlation between  $C_2$  and  $O_x$ /ALWC with reductions in pollution levels. But the significant differences between IT0 and IT4 for  $O_x$  (increasing) and ALWC (decreasing) suggests that there could be a potential shift in the dominant formation pathways in  $C_2$  formation from high to low pollution stage. To verify this hypothesis, we conducted machine learning in the next section, which generated more evidences to support our conclusions.

We have corrected our statements in manuscript to make them more rigorous.

**Table S5. Significance (p values) of the difference between correlation coefficients in different categories ( $C_2$ -ALWC).**

|     | IT0    | IT1  | IT2  | IT3  |
|-----|--------|------|------|------|
| IT1 | 0.25   |      |      |      |
| IT2 | 0.21   | 0.76 |      |      |
| IT3 | 0.15   | 0.64 | 0.89 |      |
| IT4 | < 0.05 | 0.22 | 0.37 | 0.43 |

**Table S6. Significance (p values) of the difference between correlation coefficients in different categories ( $C_2$ - $O_x$ ).**

|     | IT0    | IT1  | IT2  | IT3  |
|-----|--------|------|------|------|
| IT1 | < 0.01 |      |      |      |
| IT2 | < 0.05 | 0.84 |      |      |
| IT3 | < 0.01 | 0.47 | 0.65 |      |
| IT4 | < 0.01 | 0.22 | 0.33 | 0.55 |

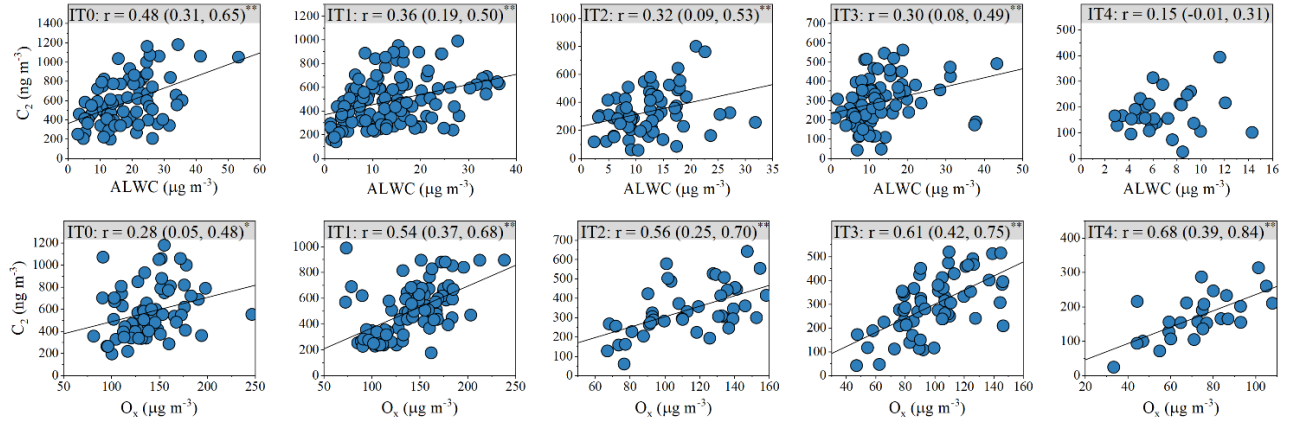

**Figure 4.** The correlation between  $C_2$  and ALWC, as well as  $O_3$ . The values in brackets indicate the 95% confidence intervals (CIs) of the correlation coefficients. One, two asterisks denote p values less than 0.05, 0.01, respectively. With decreasing pollution levels, the correlation between  $C_2$  and ALWC weakens, whereas that between  $C_2$  and  $O_3$  strengthens.

#### Text S1. Descriptions of Fisher $r$ -to- $z$ transformation.

The Pearson correlation coefficient  $r$  is widely used to quantify the strength and direction of linear relationships between two variables. However, the sampling distribution of  $r$  is not normally distributed, especially when the true correlation is far from zero or the sample size is small. To address this issue, Fisher (1921) proposed a transformation of  $r$  to a variable  $z$ , known as the Fisher  $r$ -to- $z$  transformation, defined as:

$$z = \frac{1}{2} \ln \frac{1+r}{1-r} \quad (1)$$

This transformation converts  $r$  into an approximately normal distribution, allowing for more accurate estimation of confidence intervals and hypothesis testing. The standard error of  $z$  is given as:

$$SE = 1/\sqrt{n-3} \quad (2)$$

where  $n$  is the sample size. After calculating the confidence interval in the  $z$ -space, it can be back-transformed to the original  $r$  scale, providing a robust measure of uncertainty for correlation estimates.

Furthermore, the Fisher  $r$ -to- $z$  transformation can also be used to test whether two correlation coefficients from independent samples differ significantly. For two correlations  $r_1$  and  $r_2$  with sample sizes  $n_1$  and  $n_2$ , their corresponding  $z$  values are calculated as above, and the standard error of the difference is calculated as:

$$SE = 1/\sqrt{\frac{1}{n_1-3} + \frac{1}{n_2-3}} \quad (3)$$

The difference is then standardized as:

$$Z = \frac{z_1 - z_2}{SE} \quad (4)$$



A two-tailed p value can be derived from the standard normal distribution to determine whether the difference between  $r_1$  and  $r_2$  is statistically significant. This approach provides a rigorous method for comparing correlation strengths across independent datasets.

As presented in Fig. 3, the correlations between  $C_2$  and ALWC weakened, whereas that between  $C_2$  and  $O_x$  strengthened from 2007 to 2018. It is noteworthy that no significant correlations were observed between  $C_2$  and  $O_x$  in 2007 and 2010, when ALWC concentrations were high. In contrast, a strong correlation ( $r = 0.62$ ,  $p < 0.01$ ) emerged in 2008, coinciding with a sharp decrease in ALWC (Fig. S5). This suggested that the gas-phase formation pathway of  $C_2$  might be enhanced when ALWC was low. The pattern became more pronounced with decreasing pollution levels (Fig. 4). From IT0 to IT4, ALWC decreased from  $20.9 \pm 11.0 \mu\text{g m}^{-3}$  to  $7.2 \pm 3.0 \mu\text{g m}^{-3}$  (Table S6). The Pearson's  $r$  values between  $C_2$  and ALWC dropped from 0.43 to 0.15, whereas that between  $C_2$  and  $O_x$  increased from 0.28 to 0.68. The opposite trends implied the roles of gas-phase and aqueous-phase oxidation in  $C_2$  formation might change. However, the precision and stability of Pearson's  $r$  values are strongly influenced by sample size when the variations appear small or when sample sizes differ among groups. Therefore, the differences in Pearson's  $r$  values do not necessarily imply statistically significant changes, especially when they are very close (IT1–IT4). To assess the statistical significance of these differences, we compared correlation coefficients between groups using the method described in Text S1. As shown in Table S8–S9, significant differences in the  $C_2$ - $O_x$  correlation were observed only between IT0 and the other pollution levels. For the  $C_2$ -ALWC correlation, a significant difference was found only between IT0 and IT4. Given that IT1–IT4 represents a continuous evolution of atmospheric conditions, rather than discrete and independent regimes, large differences in correlation coefficients among these categories are not expected. Although the correlation between  $C_2$  and sulfate was strong, it did not show the similar trends as that between  $C_2$  and ALWC. In contrast, the correlations between  $C_2$  and primary anthropogenic markers remained generally weak across all pollution categories (Table S7), indicating that changes in anthropogenic emissions exert only limited influence on  $C_2$  variations. Therefore, the significant and opposite changes in correlations of  $C_2$  with  $O_x$  and ALWC between high pollution level (IT0) and low pollution level (IT4) suggested a shift in the dominant  $C_2$  formation pathway from aqueous-phase oxidation to gas-phase photochemical oxidation under lower pollution conditions.

The Pearson correlation coefficients reflect the strength of linear associations but do not directly represent the quantitative contribution of each factor. Thus, the lower Pearson's  $r$  values between  $C_2$  and ALWC than those between  $C_2$  and  $O_x$  under IT1-IT4 do not necessarily imply a smaller contribution of aqueous-phase pathways compared with gas-phase pathways. Here, correlation analysis is used primarily to identify potential drivers and their changing patterns, while a machine learning model is further applied to quantify their contributions to  $C_2$  variations.

**Comment 9:** *The dataset collected during 2007-2018 is valuable and informative. My concern is the uncertainty caused by long-term storage. How long after sampling were these samples analyzed? How much of the C2 organic acid could change during storage?*

Response: Thank you for raising this important concern. We fully agree that long-term storage may introduce uncertainties in the quantification of molecular markers. In this study, all filter samples were immediately wrapped in aluminum foil and stored at -20 °C after collection. The samples were typically analyzed within several months after sampling.

Previous studies have shown that low temperature storage can largely preserve the chemical composition of ambient organic aerosols. For example, Resch et al. (2023) reported that ambient aerosol samples stored at -20 °C for more than one month largely retained their molecular profiles. High-intensity peaks, such as carboxylic acids with molecular-weight (MW) = 172, 184, 186, and 200, showed changes in peak area within  $\pm 25\%$ , indicating good stability under low temperature storage. In addition, this study demonstrates that low MW carboxylic acids are more stable than high MW carboxylic acids during storage. Thus, as a typical low MW carboxylic acid, C<sub>2</sub> is expected to remain largely stable during storage.

Although we cannot quantify decomposition of dicarboxylic acid during storage in this study, the storage duration was generally consistent across each year, minimizing potential inter-annual biases.

PM<sub>2.5</sub> samples were collected using prebaked (450°C, 4h) quartz filters (8in. × 10in., QMA, Whatman, UK). Each sample lasted for 24h using a high-volume air sampler (HVPM2.5, Tisch Environmental Inc., USA) at an airflow rate of 1.1 m<sup>3</sup> min<sup>-1</sup>. Field blank samples were also collected by mounting the blank filter onto the sampler for 10 min without turning on the sampler. In this study, a total of 462 PM<sub>2.5</sub> samples were collected mostly during the wintertime (October, November, and December) of each year from 2007 to 2018. After the collection, each filter was wrapped in an aluminum foil, zipped in Teflon bags, and stored in a freezer (-20°C) prior to analysis. Resch et al. (2023) reported that ambient aerosol samples stored at -20 °C for more than one month largely retained their molecular profiles. In addition, this study demonstrates that low MW carboxylic acids are more stable than high MW carboxylic acids during storage. Thus, the aliphatic DCA measured in this study are expected to remain largely stable during storage.

**Comment 10:** *In addition, in lines 115-116, I may suggest adding a table in the supplementary to detail the sample information.*

Response: Thanks for your suggestion. We have added PM<sub>2.5</sub> samples information in the Supplement.

**Table S2. Information of PM<sub>2.5</sub> samples.**

| Year | Duration             | Number of samples |
|------|----------------------|-------------------|
| 2007 | October to November  | 32                |
| 2008 | November to December | 45                |
| 2009 | November to December | 25                |
| 2010 | October to December  | 69                |
| 2011 | November to December | 28                |
| 2012 | November to December | 39                |
| 2013 | November to December | 29                |
| 2014 | October to November  | 20                |
| 2015 | October to November  | 37                |
| 2016 | October to November  | 33                |
| 2017 | October to December  | 55                |
| 2018 | October to December  | 50                |

#### Specific comments:

*Comment 1: Please specify the data source of solar radiation in the method section.*

Response: We apologize for not including this information. We apologize for not specifying the data source in the original manuscript. The solar radiation data used in this study were obtained from the ERA5 reanalysis dataset provided by the European Centre for Medium-Range Weather Forecasts (ECMWF) via the Copernicus Climate Data Store (CDS, <https://cds.climate.copernicus.eu/datasets/>).

Gaseous pollutants data (e.g., NO<sub>2</sub> and O<sub>3</sub>) and meteorological parameters (e.g., temperature, relative humidity) were obtained from an air quality monitoring station operated at WQS. The station was under maintenance during 2012–2013, therefore data for this period are unavailable. The **surface net solar radiation** and boundary layer height (BLH) data used in this study were obtained from the ERA5 reanalysis dataset provided by the European Centre for Medium-Range Weather Forecasts (ECMWF) via the Copernicus Climate Data Store (CDS, <https://cds.climate.copernicus.eu/datasets/>). The concentrations of PM<sub>2.5</sub> and its main components,

as well as ALWC and pH, can be found in our previous study (He et al., 2025).

**Comment 2:** In Figure 2, 3, or other similar figures, modify the name of the y-axis to the corresponding species. It would be easier for readers.

**Response:** Thanks for suggestion.

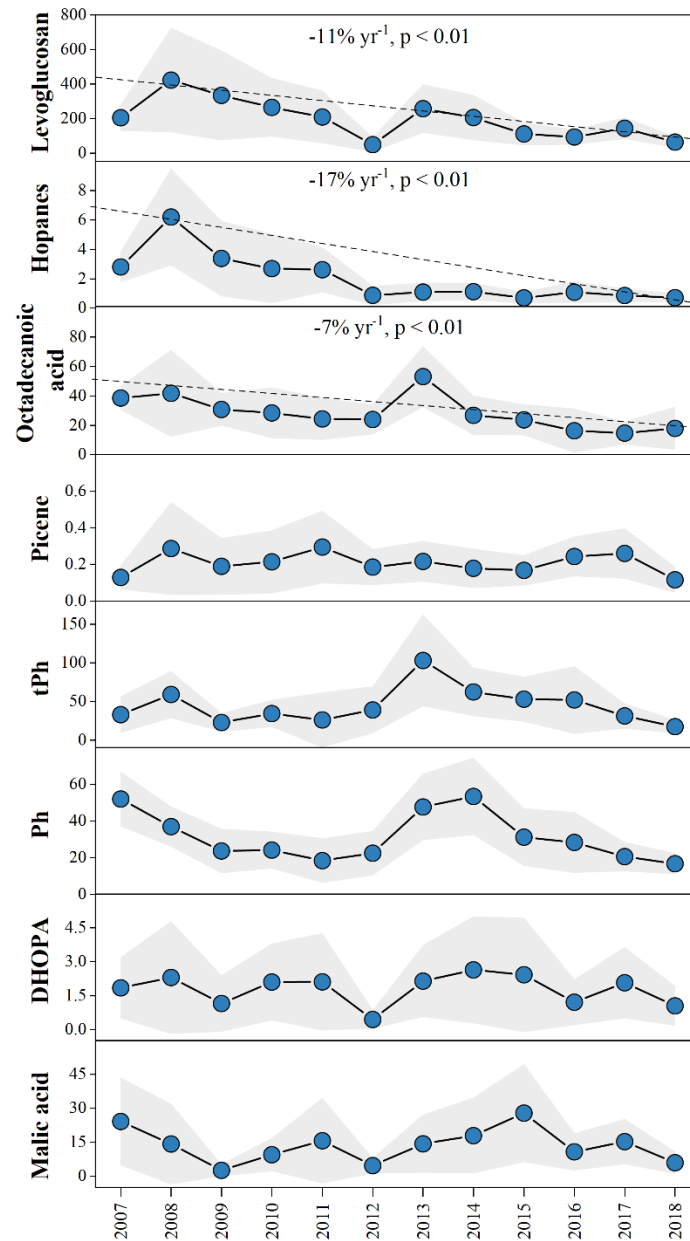

**Figure 2.** Annual variations in different molecular markers (ng m<sup>-3</sup>) in the PRD during 2007 to 2018. The shaded area represents the 95% prediction band.

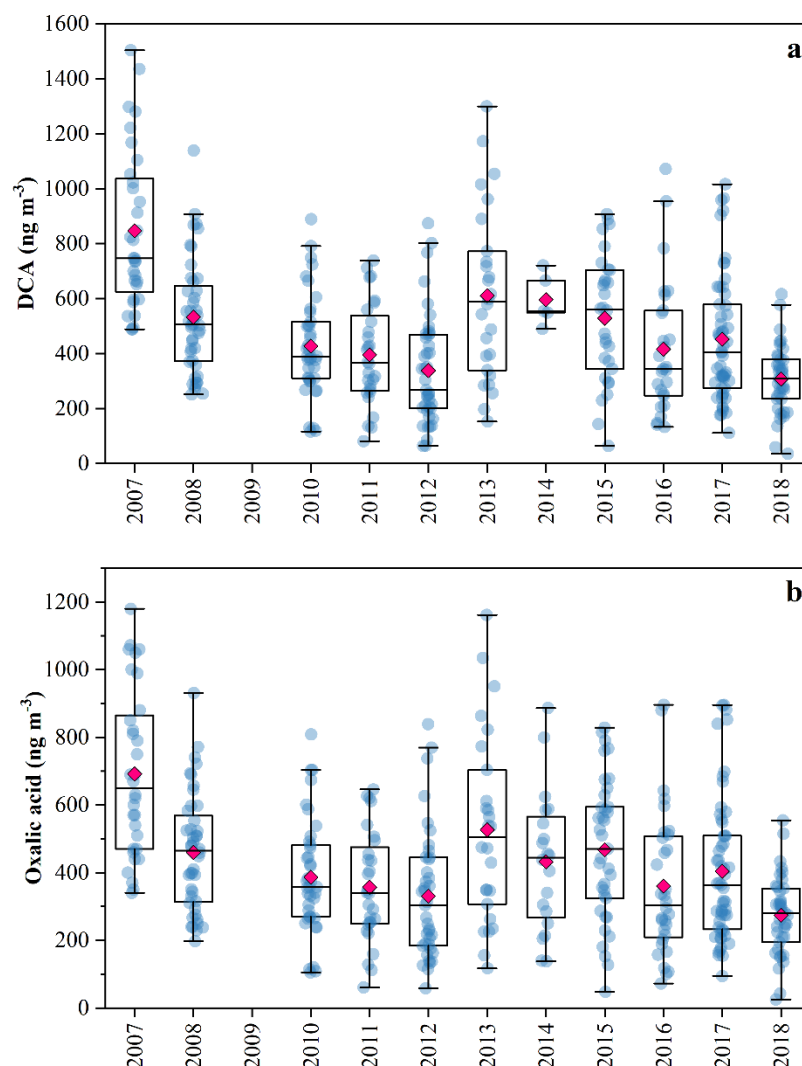

**Figure 3. (a) Annual variations in aliphatic DCA. (b) Annual variations in oxalic acid. Due to the absence of aliphatic DCA and oxalic acid measurements in 2009, their concentrations for that year are not presented.**

**Comment 3:** Figure captions need to be revised. For example, “The concentrations decreased from  $864 \pm 283 \text{ ng m}^{-3}$  (2007) to  $307 \pm 122 \text{ ng m}^{-3}$  (2018), ....”, “Pearson’s  $r$  values between C2 and ALWC decreased from 0.43 to 0.15, while those between C2 and Ox increased from 0.28 to 0.68.” or similar statements should not be described in the figure caption.

Response: Thanks for suggestion. We have revised that.

**Comment 4:** Line 225 and Table 1: Change “IT4 ( $25 \text{ ug/m}^3 > \text{PM}_{2.5}$ )” to “ $\text{PM}_{2.5} < 25 \text{ ug/m}^3$ ”.

Response: Thanks for suggestion. We have moved Table 1 to Supplement (Table S7) and changing corresponding statements in manuscript.

**Comment 5:** Lines 244-245: Please show the data or other evidence on the higher temperature,

*solar radiation, or humidity in PRD.*

Response: Thanks for your comments. The PRD region is located in southern China and is characterized by a subtropical monsoon climate, featuring warm temperatures, high humidity, and abundant solar radiation throughout the year. During wintertime, the temperatures were above 20 °C, while the RH were close to 60%. Meanwhile, solar radiation ranged from  $95.3 \pm 49.1$  to  $161.3 \pm 41.3 \text{ W m}^{-2}$  (Table S5). It is necessary to include relevant evidences to support our statement. We have added them in revised manuscript.

This was likely related to elevated temperature (above 20 °C), solar radiation (95.3–161.3 W m<sup>-2</sup>), and relative humidity (~60%) in the PRD (Table S5), which led to a higher degree of aerosol aging.

**Comment 6:** Lines 330-332: Please show evidence on the statement that lower ALWC favors the C<sub>2</sub> compounds from the particle-phase to the gas-phase.

Response: Thank you for this comment. We apologize for inappropriate wording in the original manuscript. According to Hu et al. (2022), more than 90% of the gas–particle partitioning of glyoxal (Gly) and methylglyoxal (mGly) proceeds through an irreversible pathway. Moreover, this irreversible uptake was found to be positively dependent on relative humidity (RH) and the abundance of secondary inorganic aerosols (SNA; sulfate, nitrate, and ammonium), which are key determinants of aerosol liquid water content (ALWC). Therefore, we should state it as “lower ALWC levels would suppress the partitioning of semi-volatile C<sub>2</sub> precursors (e.g., Gly and mGly) from the gas-phase into the particle-phase”. The statement has been revised accordingly, and the relevant reference has been added to the manuscript.

The IF values for each variable are presented in Table S10. From IT0 to IT4, IF values for gas-phase oxidation processes increased from 37% to 55%, whereas those for aqueous-phase oxidation processes decreased from 42% to 30% (Fig. 6b). Meanwhile, IF values for AVOC (10%–15%) and BVOC emissions (5%–8%) remained at a low and stable level. These findings indicated that the gas-phase oxidation pathway became increasingly important as pollution levels decreased. A possible explanation is that under cleaner conditions, lower ALWC levels would suppress the partitioning of semi-volatile C<sub>2</sub> precursors (e.g., Gly and mGly) from the gas-phase into the particle-phase (Hu et al., 2022).

## References:

- Bian, Y. H., Huang, Z. J., Ou, J. M., Zhong, Z. M., Xu, Y. Q., Zhang, Z. W., Xiao, X., Ye, X., Wu, Y. Q., Yin, X. H., Li, C., Chen, L. F., Shao, M., and Zheng, J. Y.: Evolution of anthropogenic air pollutant emissions in Guangdong Province, China, from 2006 to 2015, *Atmos. Chem. Phys.*, 19, 11701-11719, <https://doi.org/10.5194/acp-19-11701-2019>, 2019.
- Fisher, R. A. S.: On the “Probable Error” of a Coefficient of Correlation Deduced from a Small Sample, *Metron*, <https://digital.library.adelaide.edu.au/server/api/core/bitstreams/d40cfd09-0ddc-490a-89c1-437bf6ae26ef/content>, 1921.
- Guenther, A., Karl, T., Harley, P., Wiedinmyer, C., Palmer, P. I., and Geron, C.: Estimates of global terrestrial isoprene emissions using MEGAN (Model of Emissions of Gases and Aerosols from Nature), *Atmos. Chem. Phys.*, 6, 3181-3210, <https://doi.org/10.5194/acp-6-3181-2006>, 2006.
- Guenther, A. B., Zimmerman, P. R., Harley, P. C., Monson, R. K., and Fall, R.: Isoprene and monoterpene emission rate variability: Model evaluations and sensitivity analyses, *Journal of Geophysical Research-Atmospheres*, 98, 12609-12617, <https://doi.org/10.1029/93JD00527>, 1993.
- He, Y., Ding, X., He, Q., Zhang, Y., Chen, D., Zhang, T., Yang, K., Wang, J., Cheng, Q., Jiang, H., Wang, Z., Liu, P., Wang, X., and Boy, M.: Long-term Trends in PM<sub>2.5</sub> Chemical Composition and Its Impact on Aerosol Properties: Field Observations from 2007 to 2020 in Pearl River Delta, South China, *Atmos. Chem. Phys.*, 25, 13729-13745, <https://doi.org/10.5194/acp-25-13729-2025>, 2025.
- Hu, J., Chen, Z., Qin, X., and Dong, P.: Reversible and irreversible gas-particle partitioning of dicarbonyl compounds observed in the real atmosphere, *Atmos. Chem. Phys.*, 22, 6971-6987, <https://doi.org/10.5194/acp-22-6971-2022>, 2022.
- Kawamura, K. and Bikkina, S.: A review of dicarboxylic acids and related compounds in atmospheric aerosols: Molecular distributions, sources and transformation, *Atmos. Res.*, 170, 140-160, <https://doi.org/10.1016/j.atmosres.2015.11.018>, 2016.
- Meng, J., Wang, Y., Li, Y., Huang, T., Wang, Z., Wang, Y., Chen, M., Hou, Z., Zhou, H., Lu, K., Kawamura, K., and Fu, P.: Measurement Report: Investigation on the sources and formation processes of dicarboxylic acids and related species in urban aerosols before and during the COVID-19 lockdown in Jinan, East China, *Atmos. Chem. Phys.*, 23, 14481-14503, <https://doi.org/10.5194/acp-23-14481-2023>, 2023.
- Resch, J., Wolfer, K., Barth, A., and Kalberer, M.: Effects of storage conditions on the molecular-level composition of organic aerosol particles, *Atmos. Chem. Phys.*, 23, 9161-9171, <https://doi.org/10.5194/acp-23-9161-2023>, 2023.
- Wang, N., Xu, J. W., Pei, C. L., Tang, R., Zhou, D. R., Chen, Y. N., Li, M., Deng, X. J., Deng, T., Huang, X., and Ding, A. J.: Air Quality During COVID-19 Lockdown in the Yangtze River Delta and the Pearl River Delta: Two Different Responsive Mechanisms to Emission Reductions in China, *Environ. Sci. Technol.*, 55, 5721-5730, <https://doi.org/10.1021/acs.est.0c08383>, 2021.
- Yan, F. H., Chen, W. H., Jia, S. G., Zhong, B. Q., Yang, L. M., Mao, J. Y., Chang, M., Shao, M., Yuan, B., Situ, S., Wang, X. M., Chen, D. H., and Wang, X. M.: Stabilization for the secondary species contribution to PM<sub>2.5</sub> in the Pearl River Delta (PRD) over the past decade, China: A meta-analysis, *Atmos. Environ.*, 242, <https://doi.org/10.1016/j.atmosenv.2020.117817>, 2020.
